# Supplementary material for: From lamellar to hierarchical: overcoming the diffusion barriers of sulfide-intercalated layered double hydroxides for highly efficient water treatment
Source: Royal Society of Chemistry journal article supplement (doi:10.1039/c7ta08598b), 2017-01-01
Supplement: c7ta08598b1.pdf [file c7ta08598b1.pdf]

## Supporting information:

# From lamellar to hierarchical: Overcoming the diffusion barriers of sulfide intercalated layered double hydroxide for highly efficient water treatment

*Jing Wang,<sup>ac</sup> Zhenyu Li,<sup>a</sup> Na Hu,<sup>b</sup> Lizhi Liu,<sup>a</sup> Chuanhui Huang,<sup>c</sup> Qingfeng Yang,<sup>a</sup>*

*Yanru Wang,<sup>a</sup> Yourui Suo,<sup>b</sup> Tie Wang,<sup>c\*</sup> Jianlong Wang<sup>a\*</sup>*

*a.* College of Food Science and Engineering, Northwest A&F University, Yangling, 712100, Shaanxi, P.R. China

*b.* Qinghai Key Laboratory of Qinghai-Tibet Plateau Biological Resources, Northwest Institute of Plateau Biology, The Chinese Academy of Sciences, Xining, 810008, Qinghai, P.R. China

*c.* Beijing National Laboratory for Molecular Sciences, Key Laboratory of Analytical Chemistry for Living Biosystems, Institute of Chemistry, The Chinese Academy of Sciences, #2 Zhongguancun North First Street, 100190, Beijing, P.R. China

### Corresponding Author

\* E-mail: Jianlong Wang, wanglong79@nwsuaf.edu.cn and Tie Wang, wangtie@iccas.ac.cn

**S 1. EDX mapping of h-NFL-S@nf and l-NFL-S@nf**

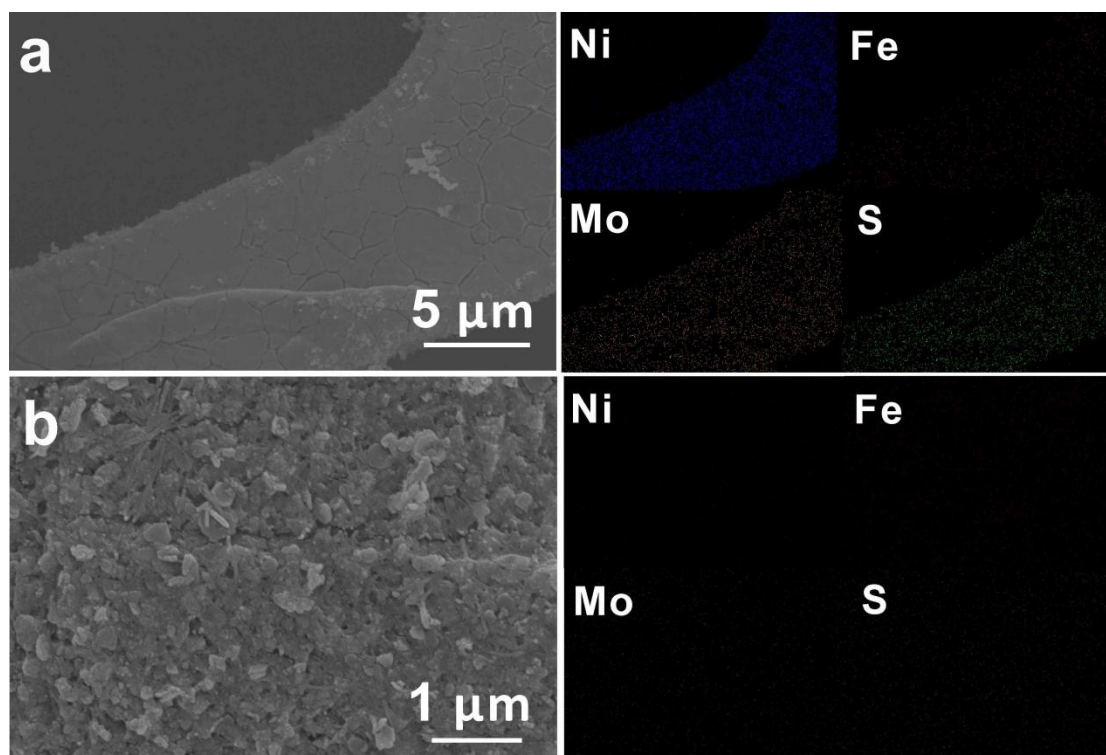

**Figure S1.** EDX mapping of a) hierarchical NFL-S and b) lamellar NFL-S, and the homogeneously distribution of Ni, Fe, Mo and S on the substrate of Ni foam.

## S 2. Adsorption kinetic parameters

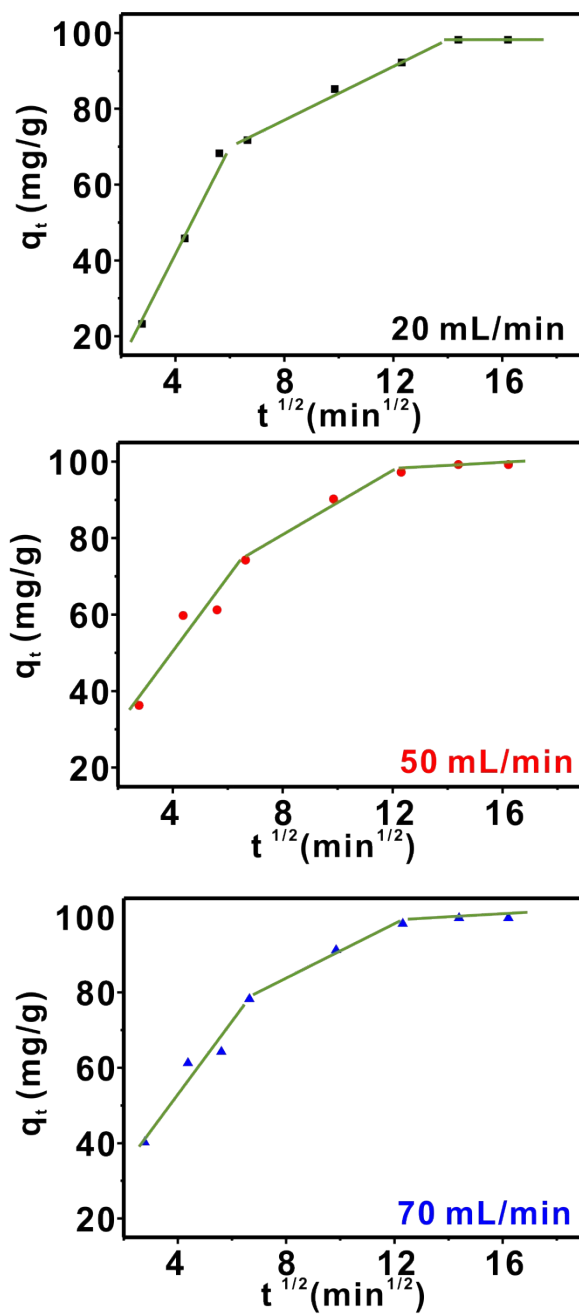

**Figure S2.** Intra-particle diffusion model (Weber-Morris) of  $Pb^{2+}$  under different velocity of fluid flow.

**Table S1.** Kinetic parameters of Pb(II) adsorption on h-NFL-S@nf under different velocity of fluid flow.

| Velocity<br>(mL/min) | pesudo-second-order |                     |                       |       | pecudo-first-order            |                 |       | intra-particle diffusion |         |       |
|----------------------|---------------------|---------------------|-----------------------|-------|-------------------------------|-----------------|-------|--------------------------|---------|-------|
|                      | $q_{e,exp}$         | $k_2$<br>(g/mg min) | $q_{e,cal}$<br>(mg/g) | $R^2$ | $k_1$<br>(min <sup>-1</sup> ) | $q_e$<br>(mg/g) | $R^2$ | $k_i$                    | $c_i$   | $R^2$ |
| 20                   | 91.83               | 0.0002              | 104.94                | 0.994 | 0.019                         | 95.10           | 0.993 | 12.412                   | 0.441   | 0.995 |
| 50                   | 97.46               | 0.0003              | 107.52                | 0.997 | 0.027                         | 95.17           | 0.978 | 9.660                    | 30.3595 | 0.951 |
| 70                   | 97.48               | 0.0004              | 106.38                | 0.999 | 0.030                         | 95.50           | 0.979 | 9.793                    | 39.129  | 0.976 |

S3. XPS S 2p and O 1s spectra of the NFL-S before and after heavy metal adsorption

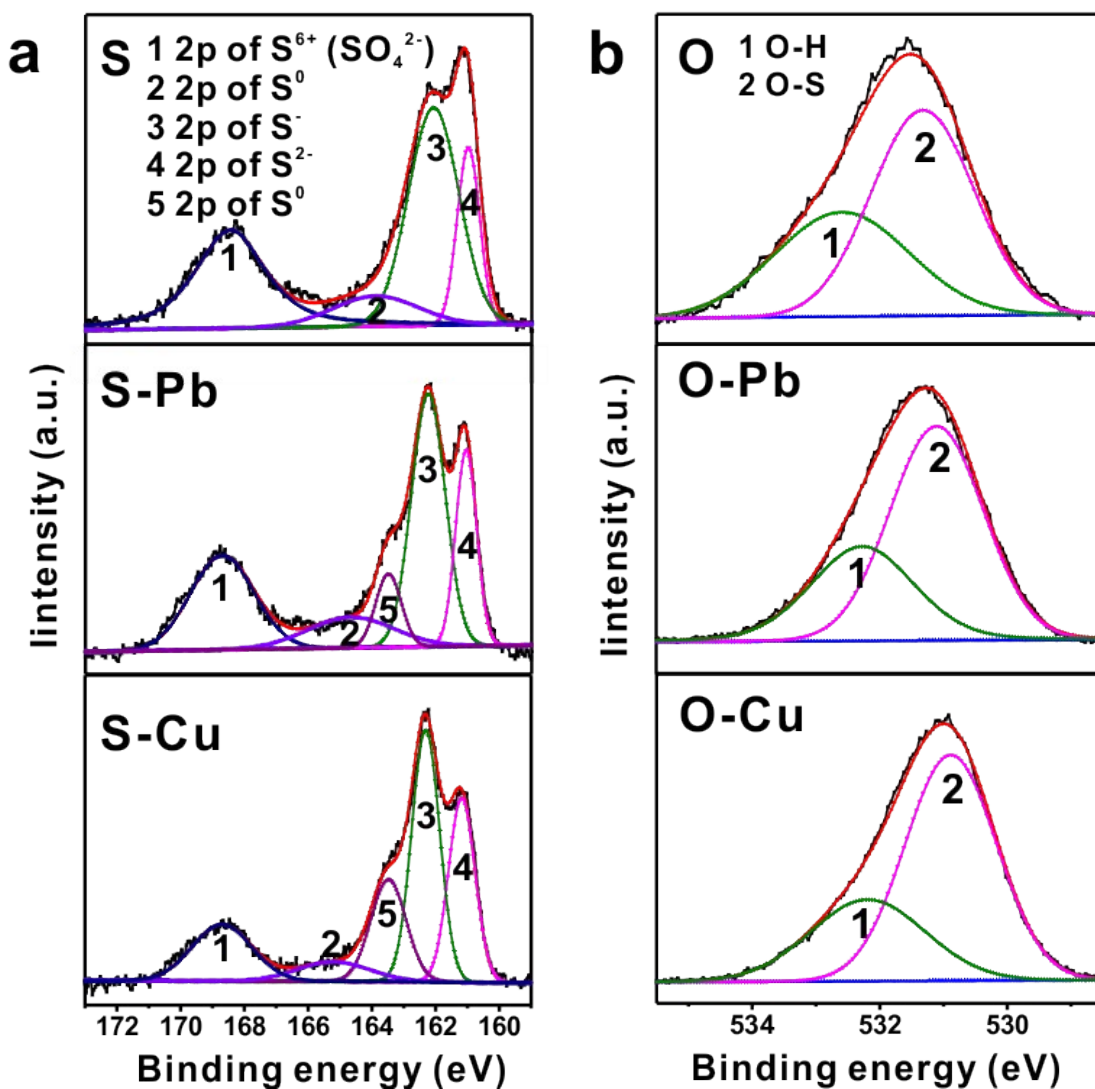

**Figure S3.** XPS a) S 2p and b) O 1s spectra of the NFL-S before and after heavy metal adsorption (Pb<sup>2+</sup> and Cu<sup>2+</sup>).

#### S4. Reusability study

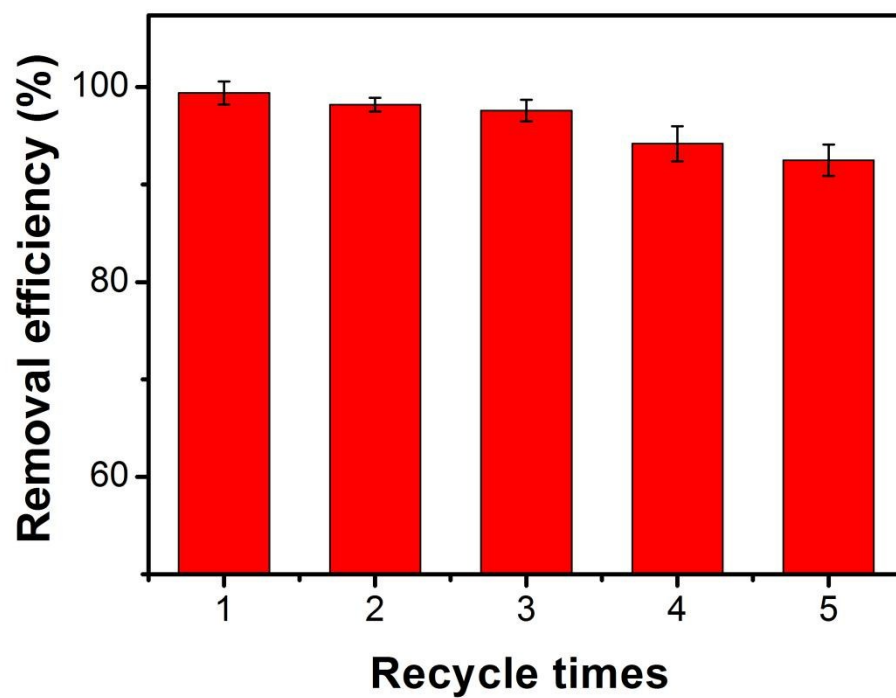

**Figure S4.** Pb(II) removal efficiency and recycling of h-NFL-S@nf. The initial concentration of Pb(II) is 10 mg L<sup>-1</sup>.
